# Supplementary material
Source: PubMed Central journal article supplement (PMC3258037)

SUPP FIG 1

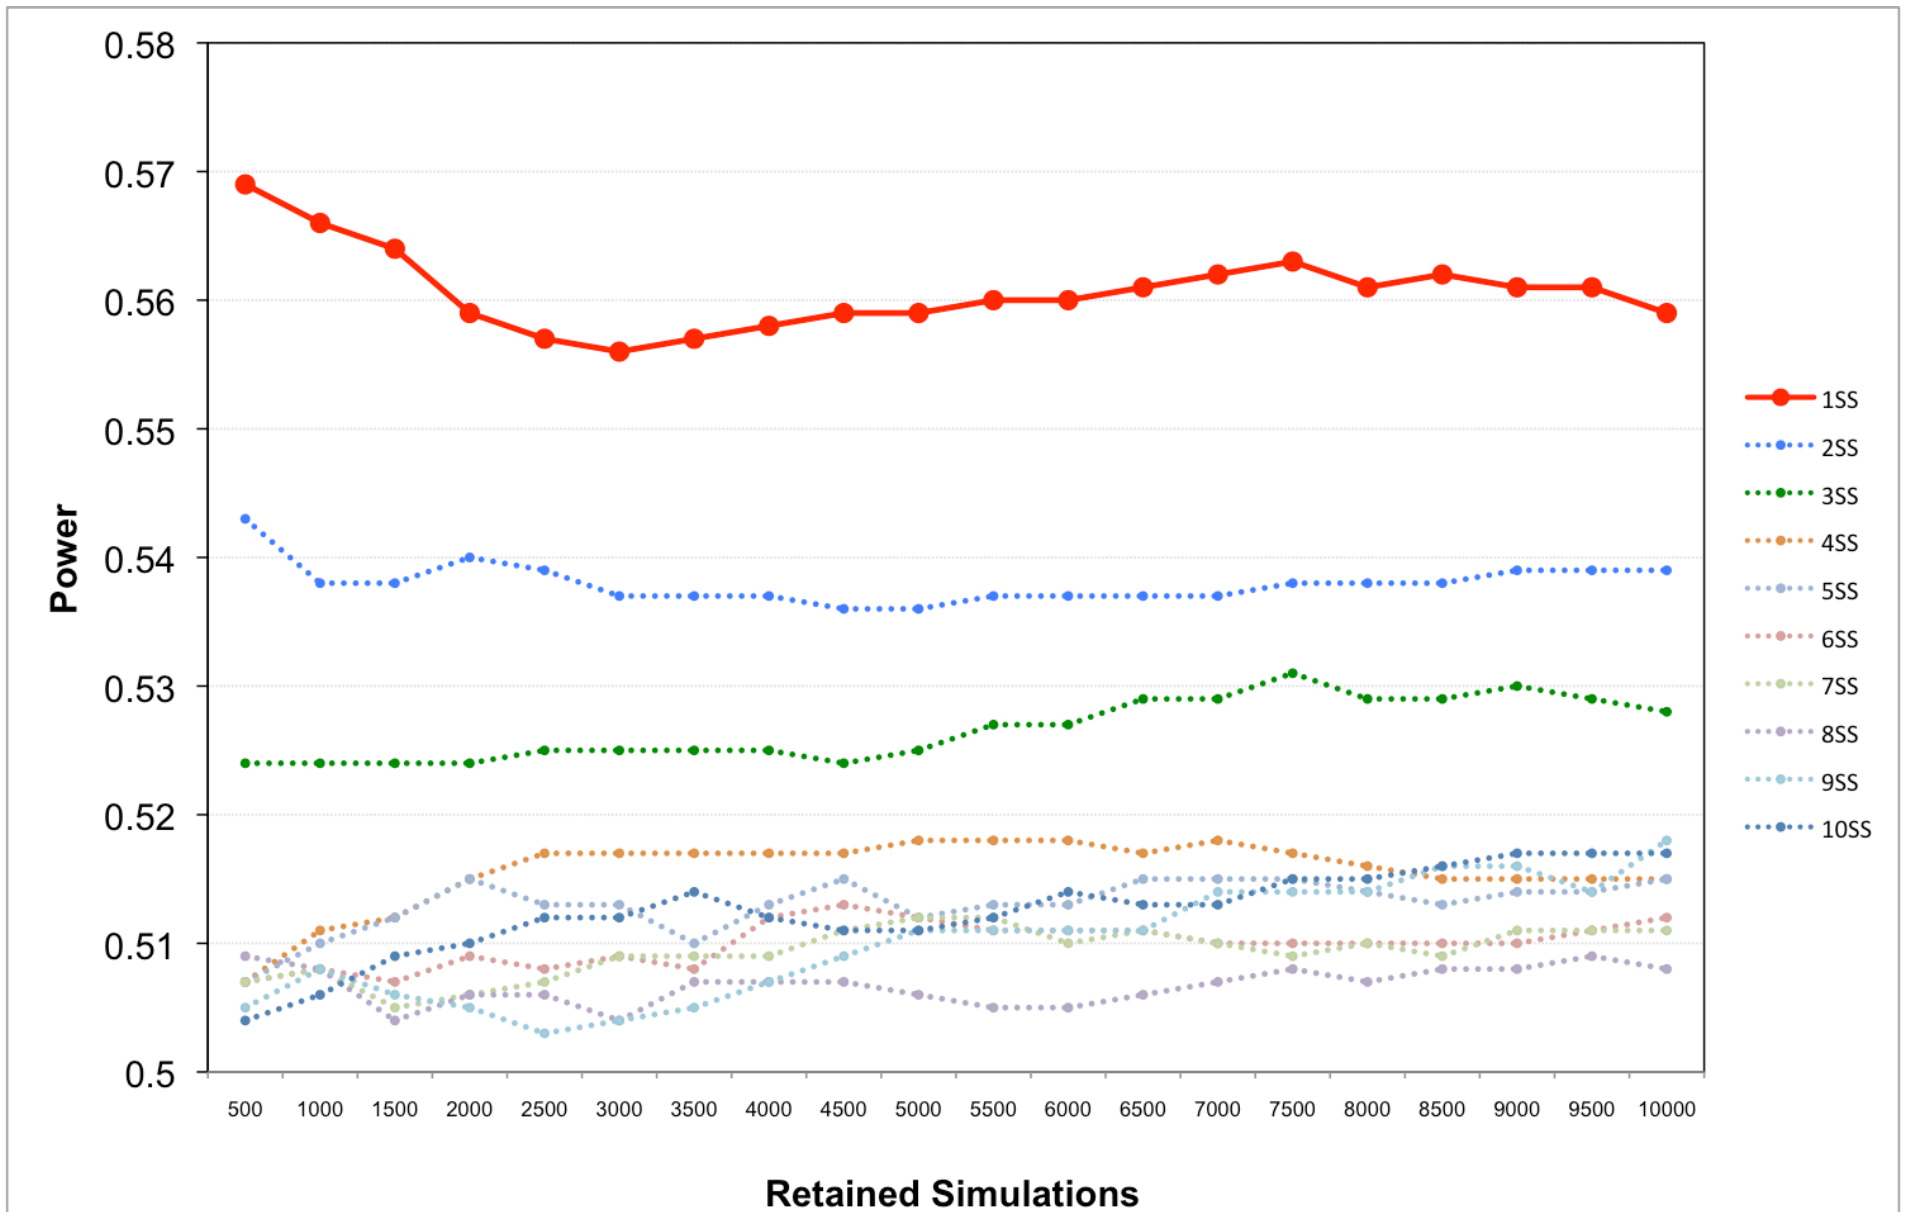

SUPP FIG 2

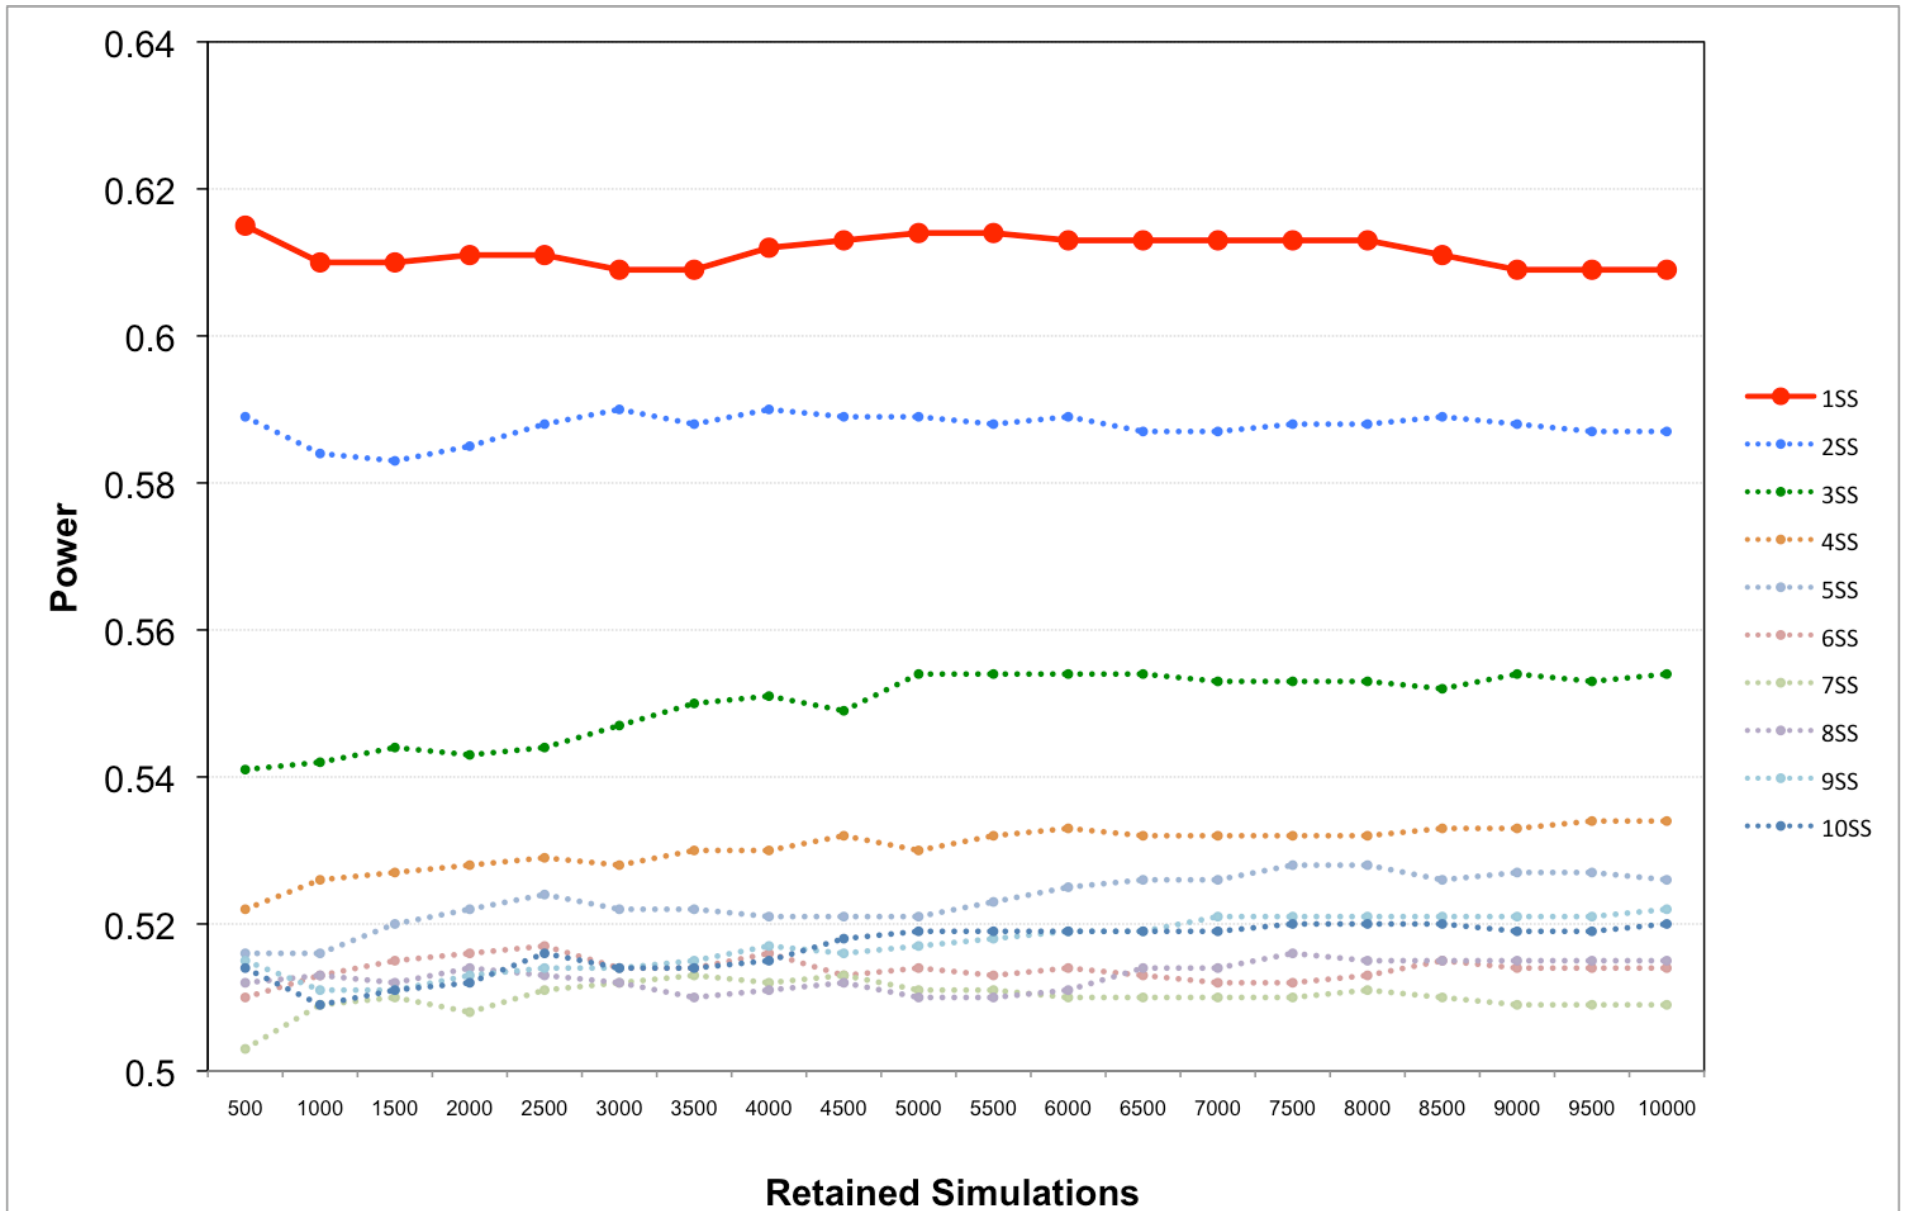

SUPP FIG 3

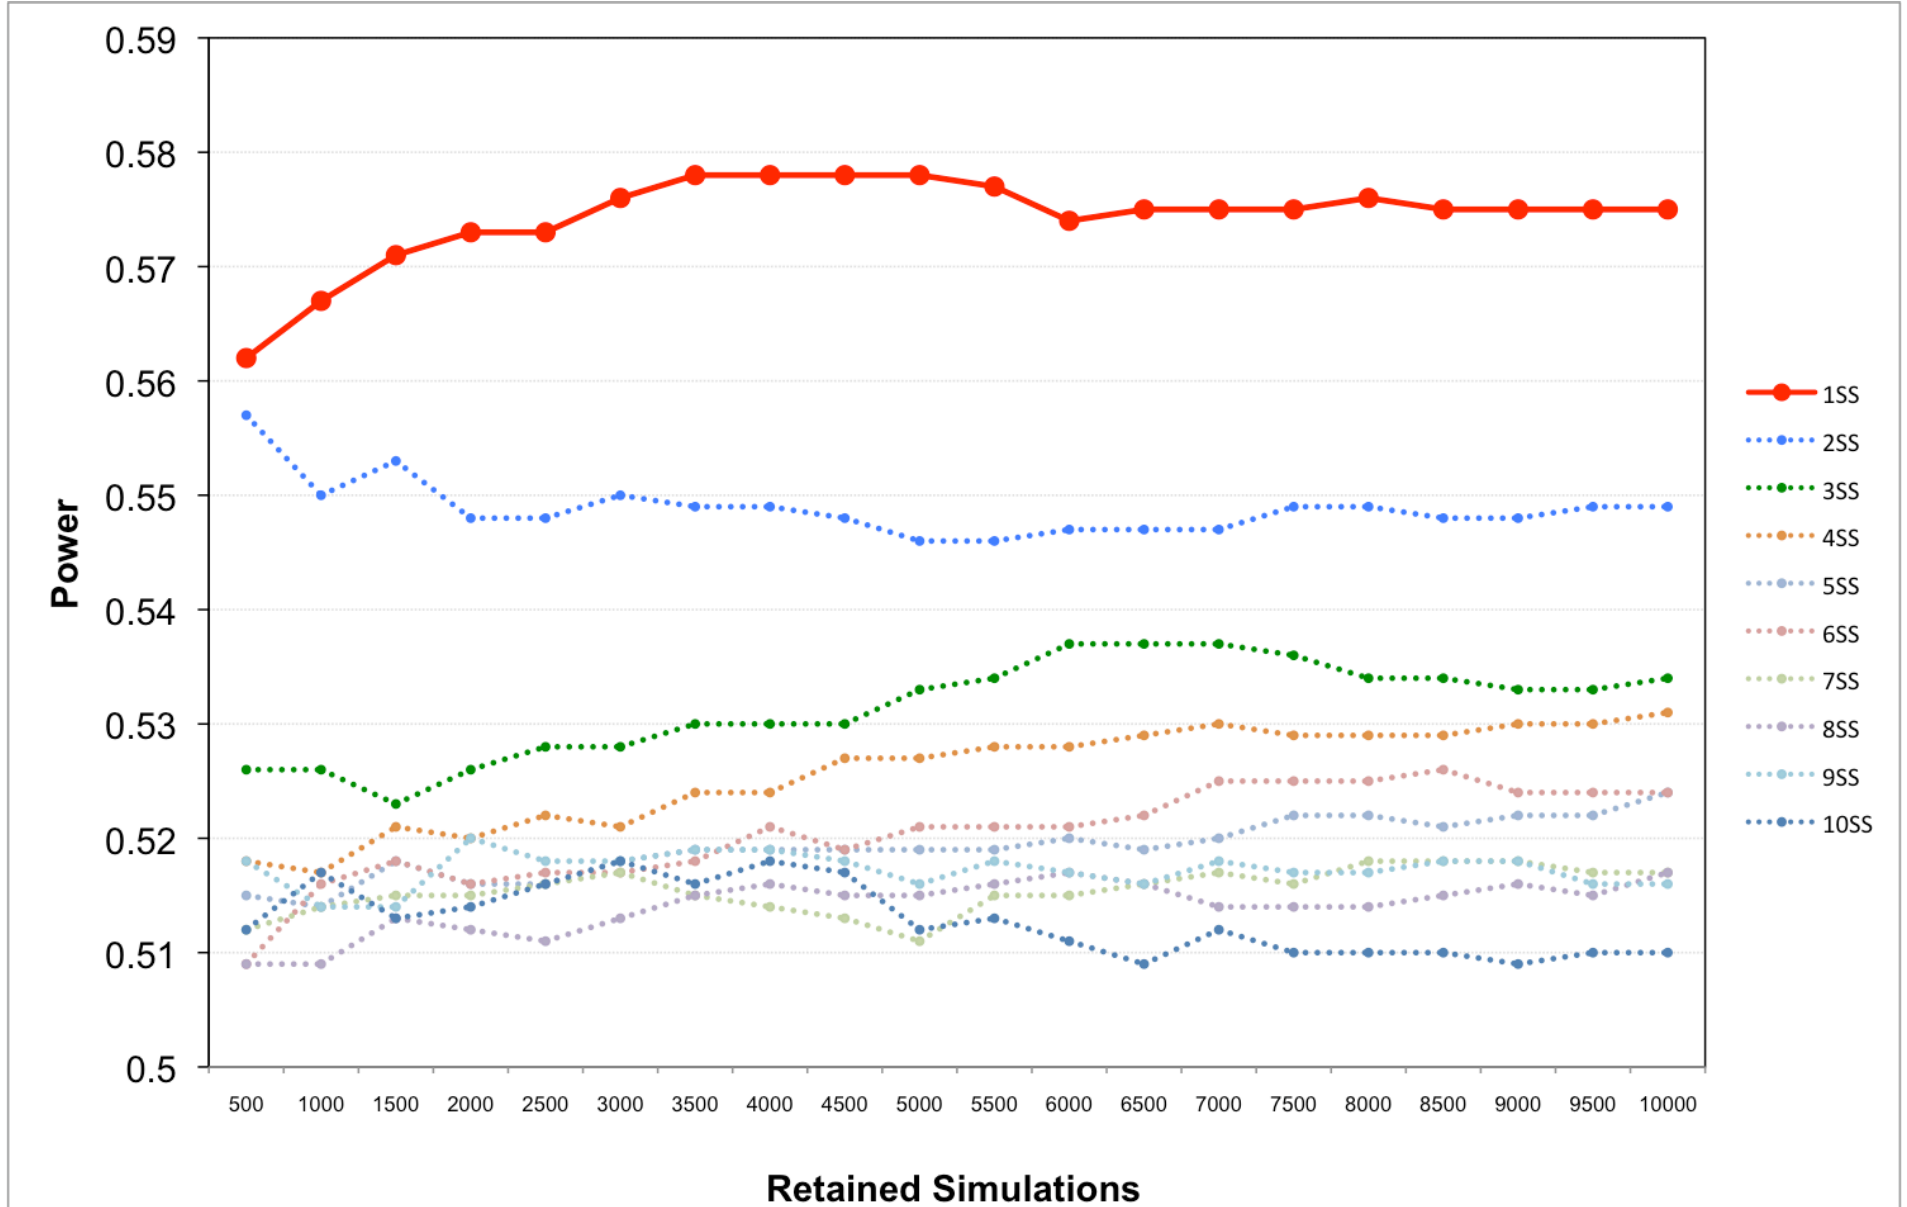

SUPP FIG 4

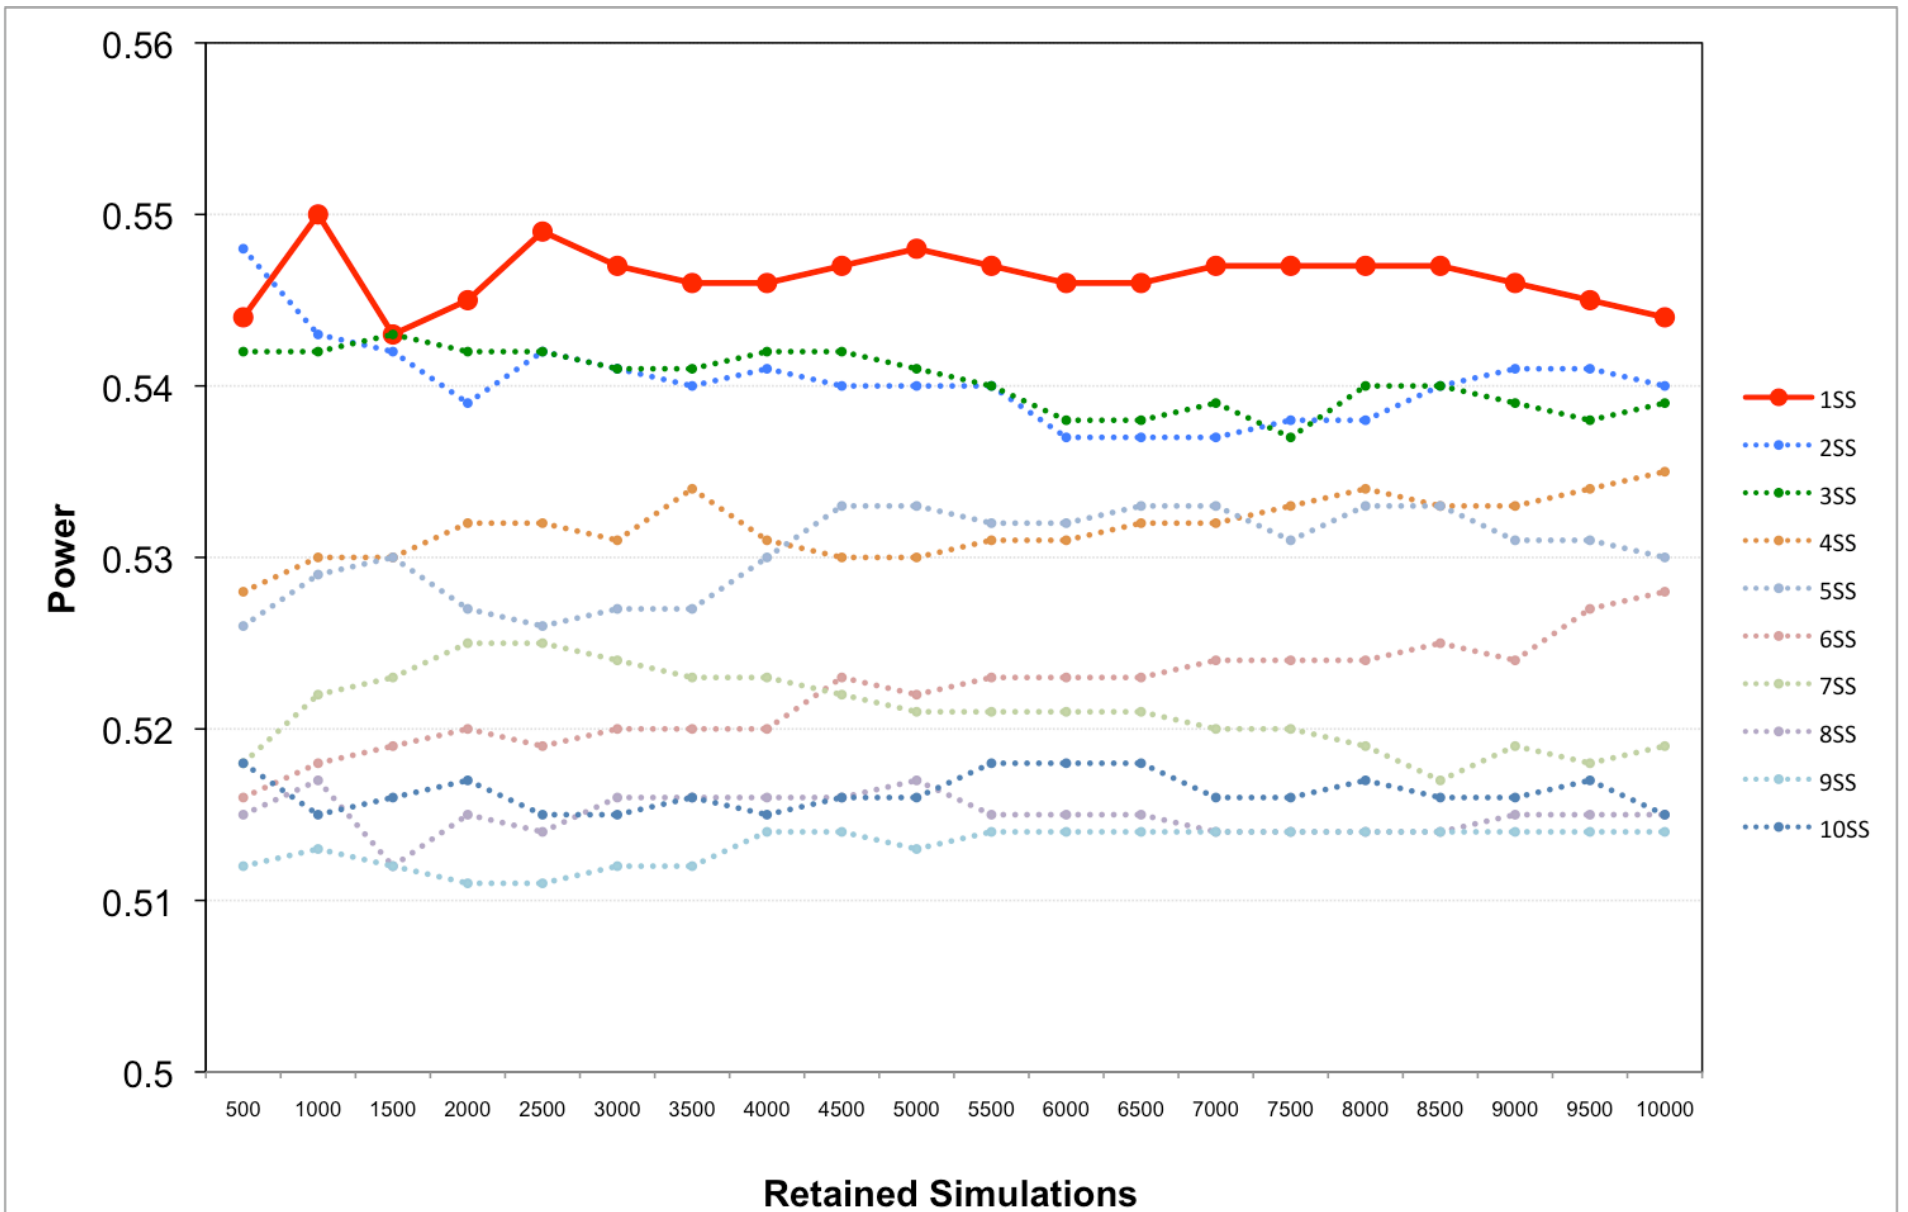

SUPP FIG 5

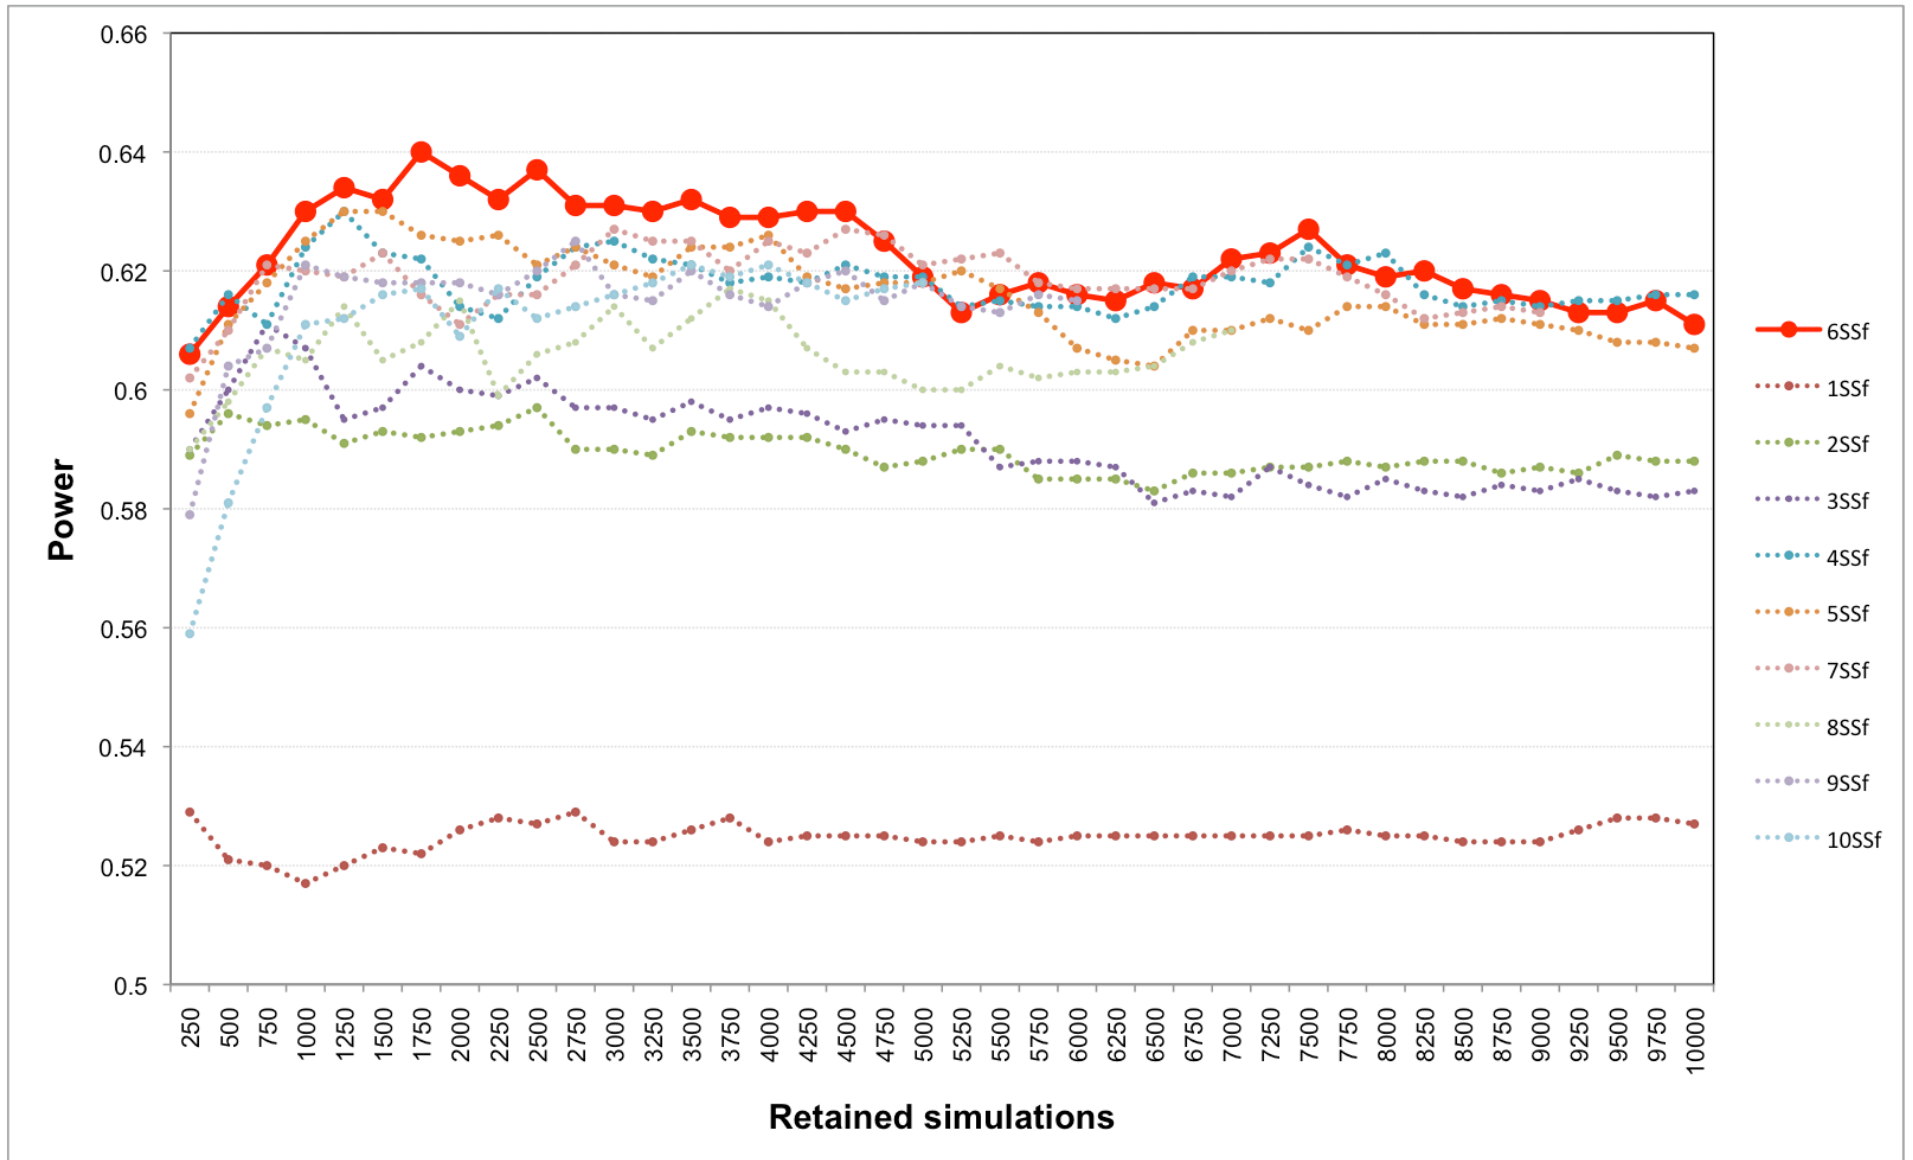

SUPP FIG 6

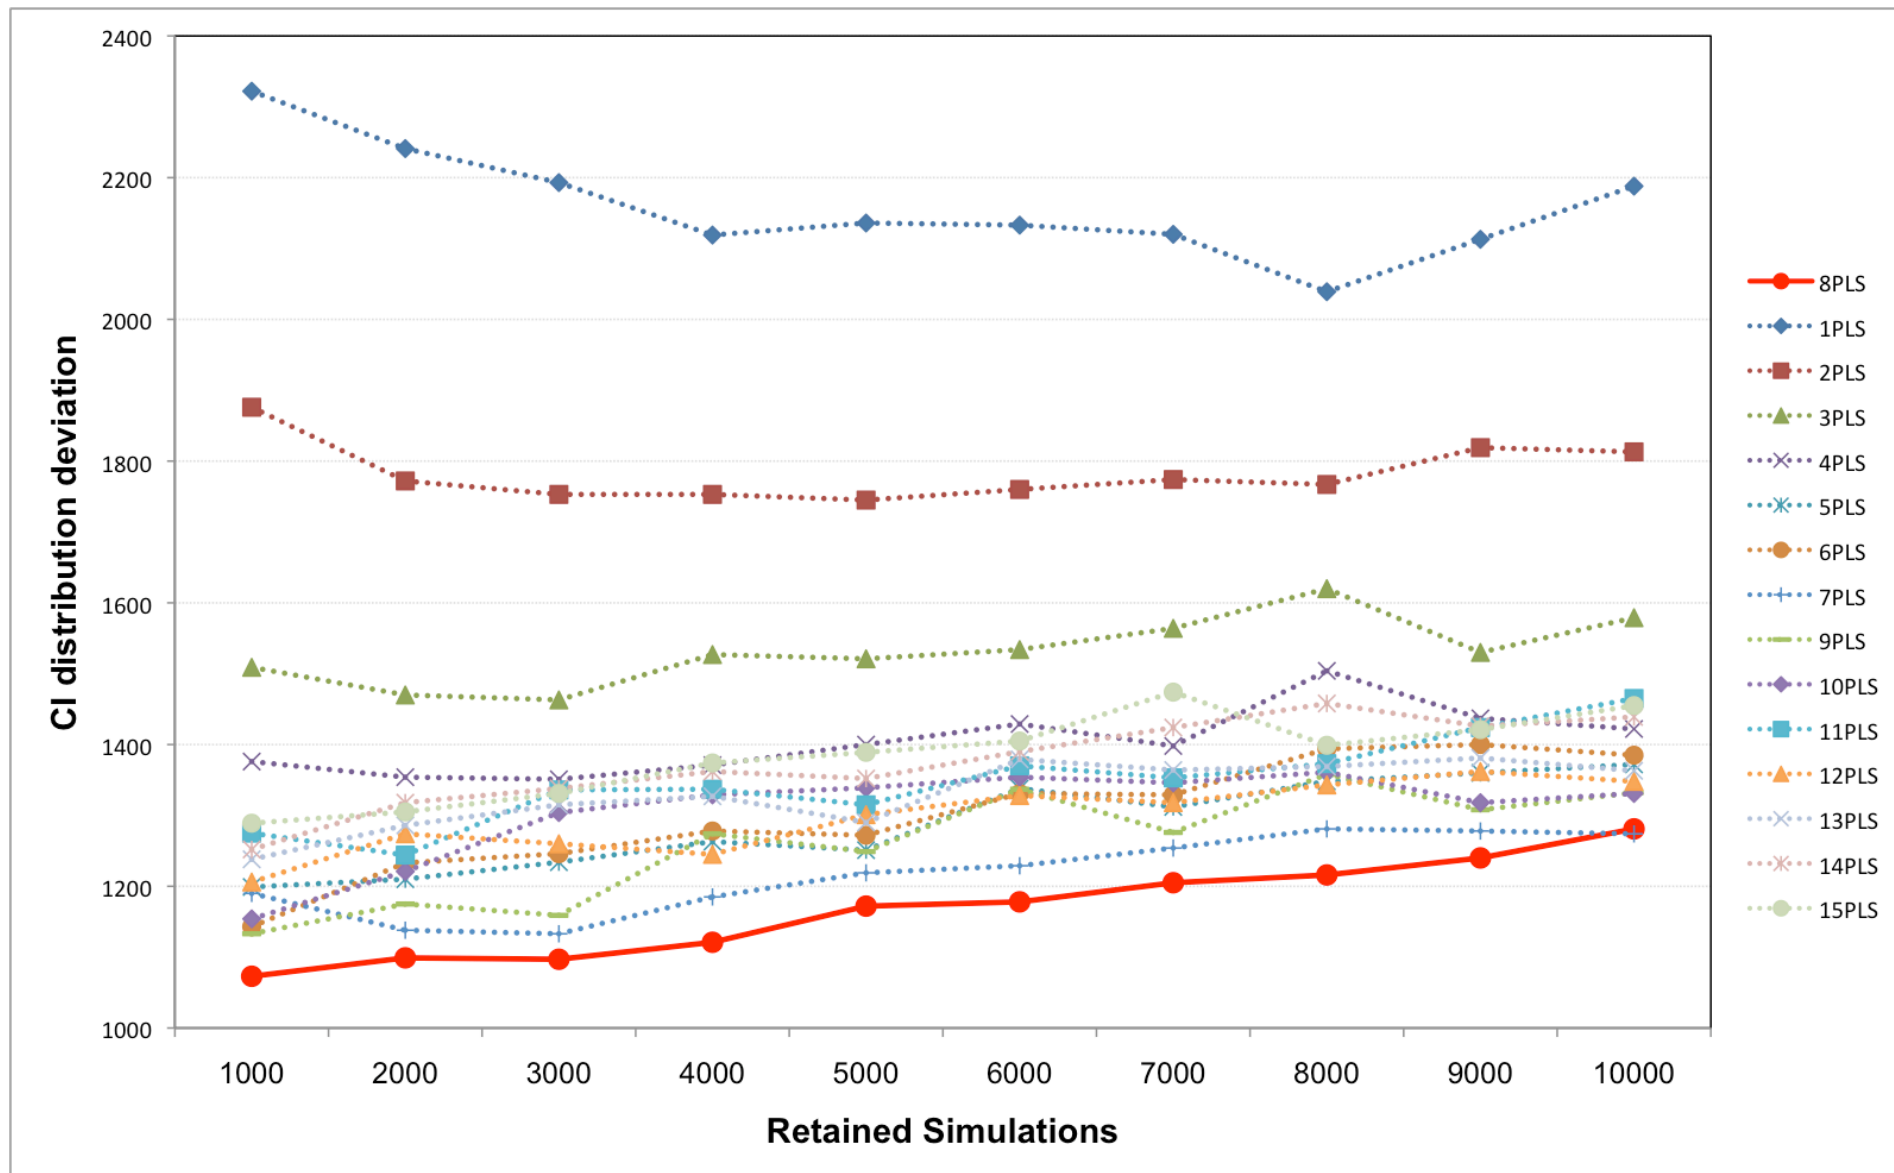

SUPP FIG 7

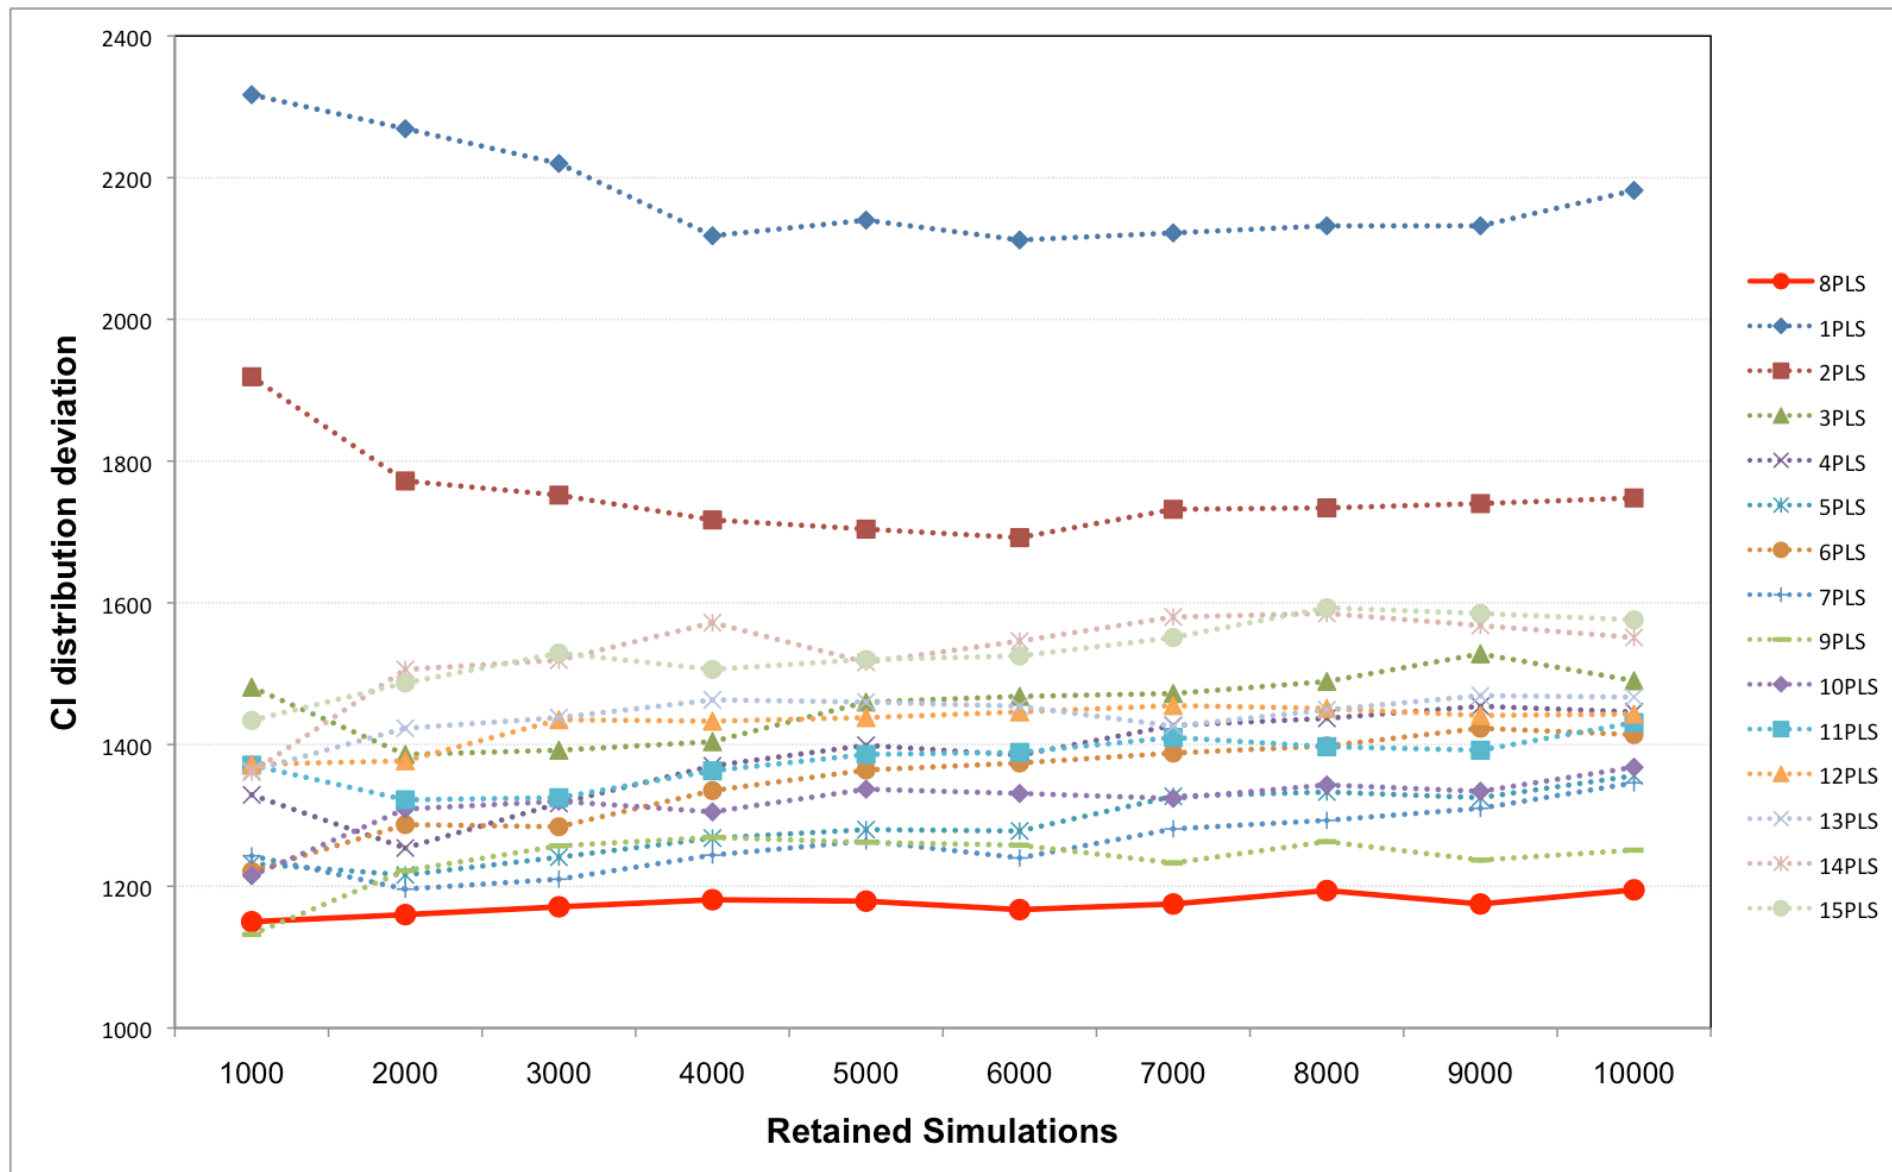

SUPP FIG 8

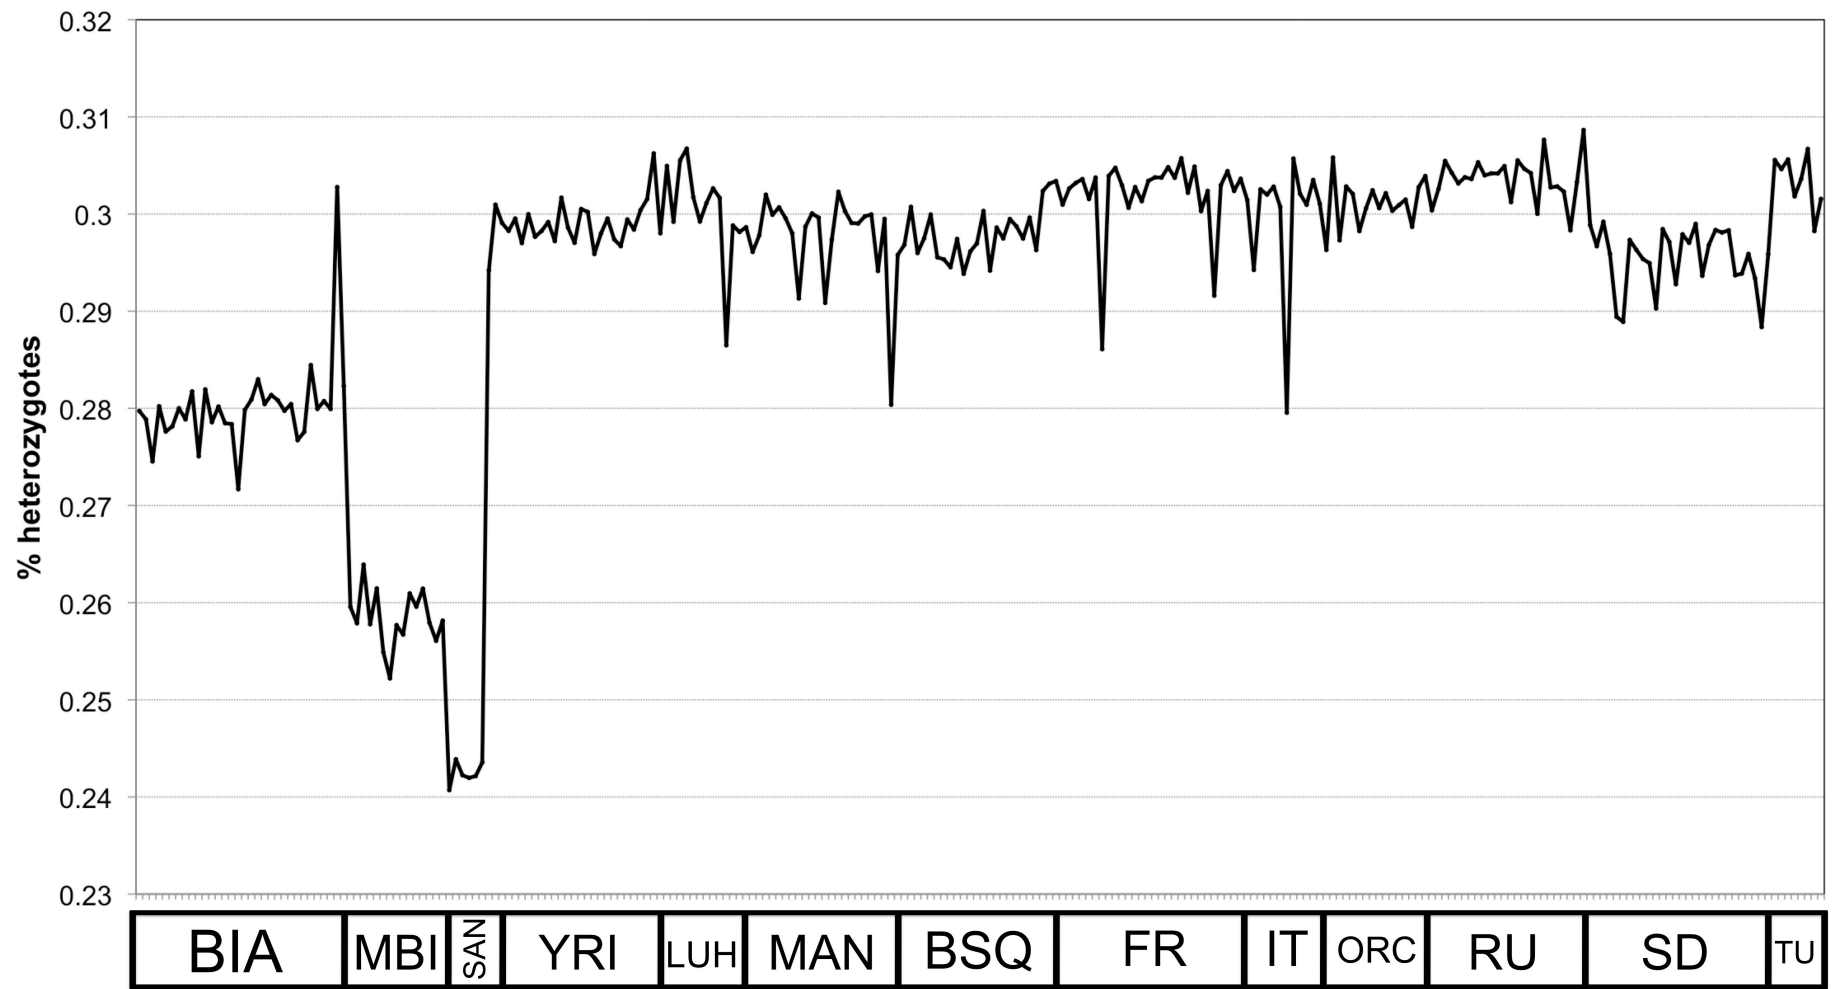



# SUPP FIG 9

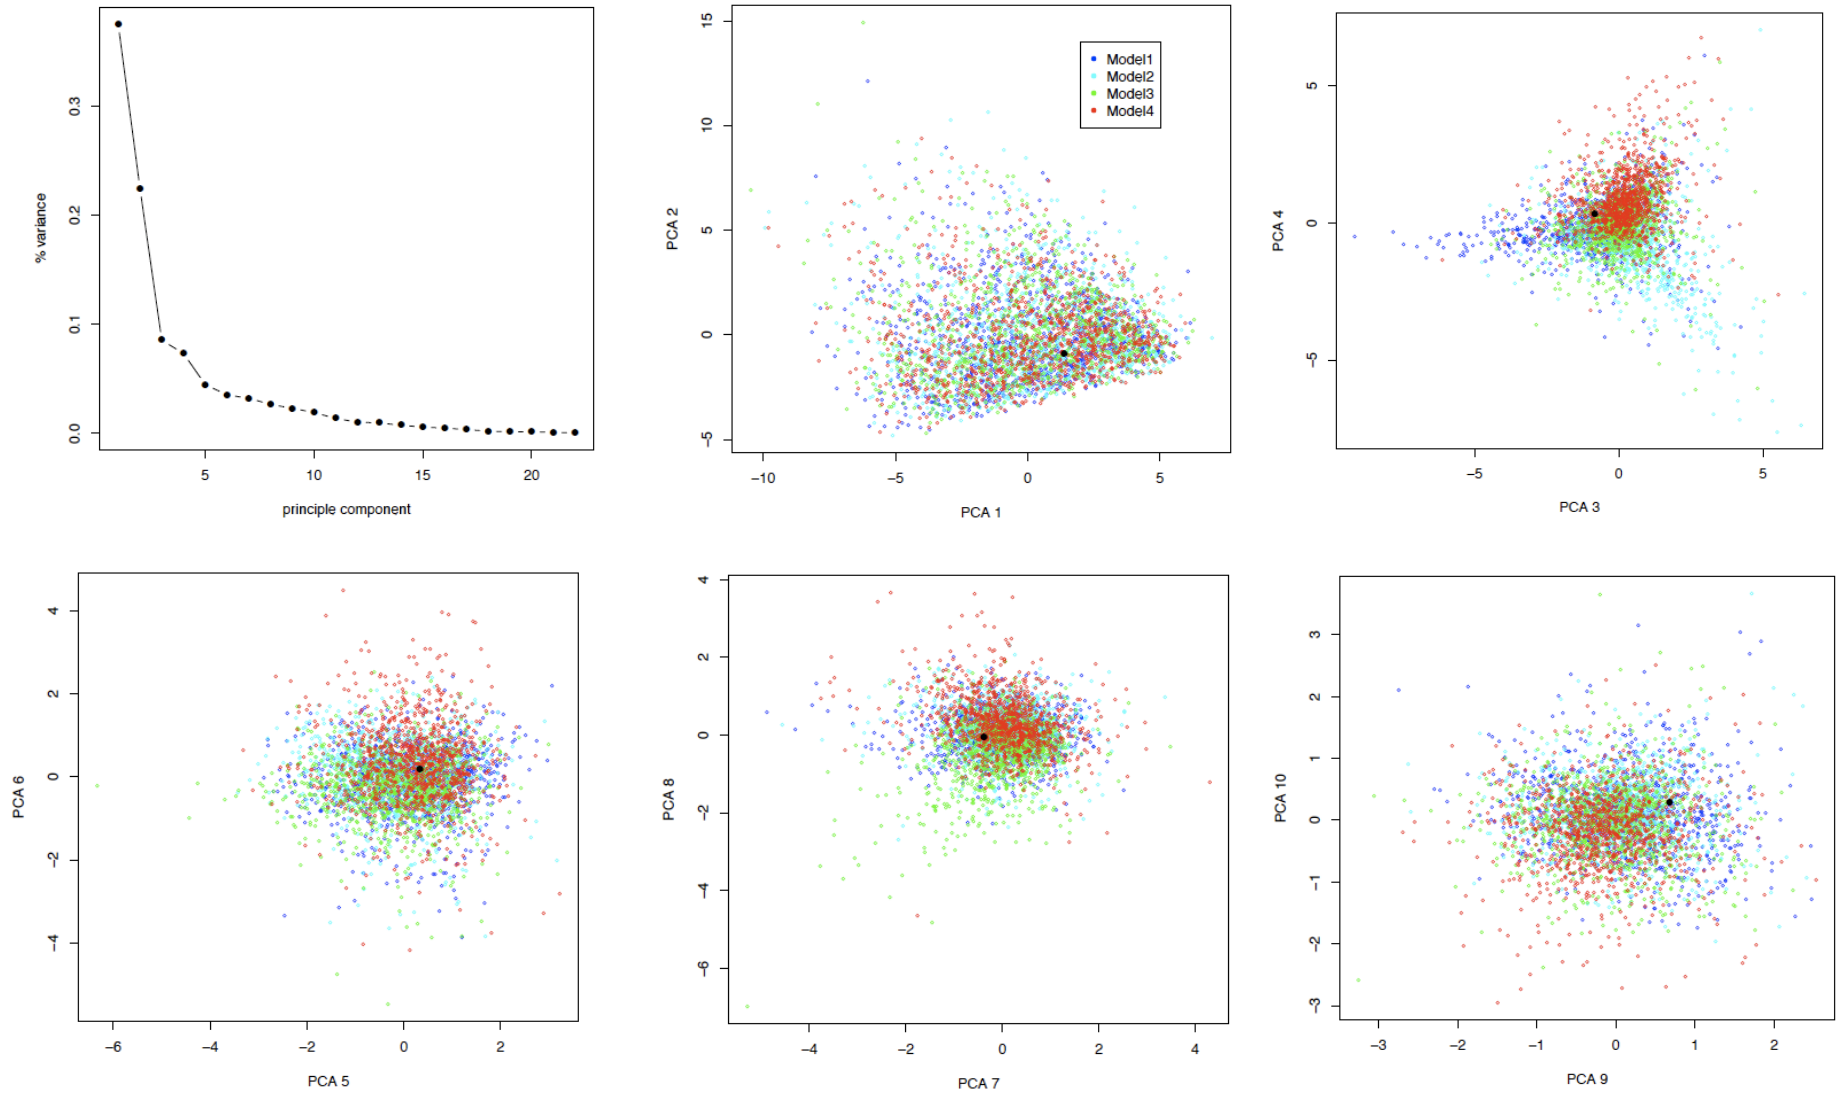

SUPP FIG 10

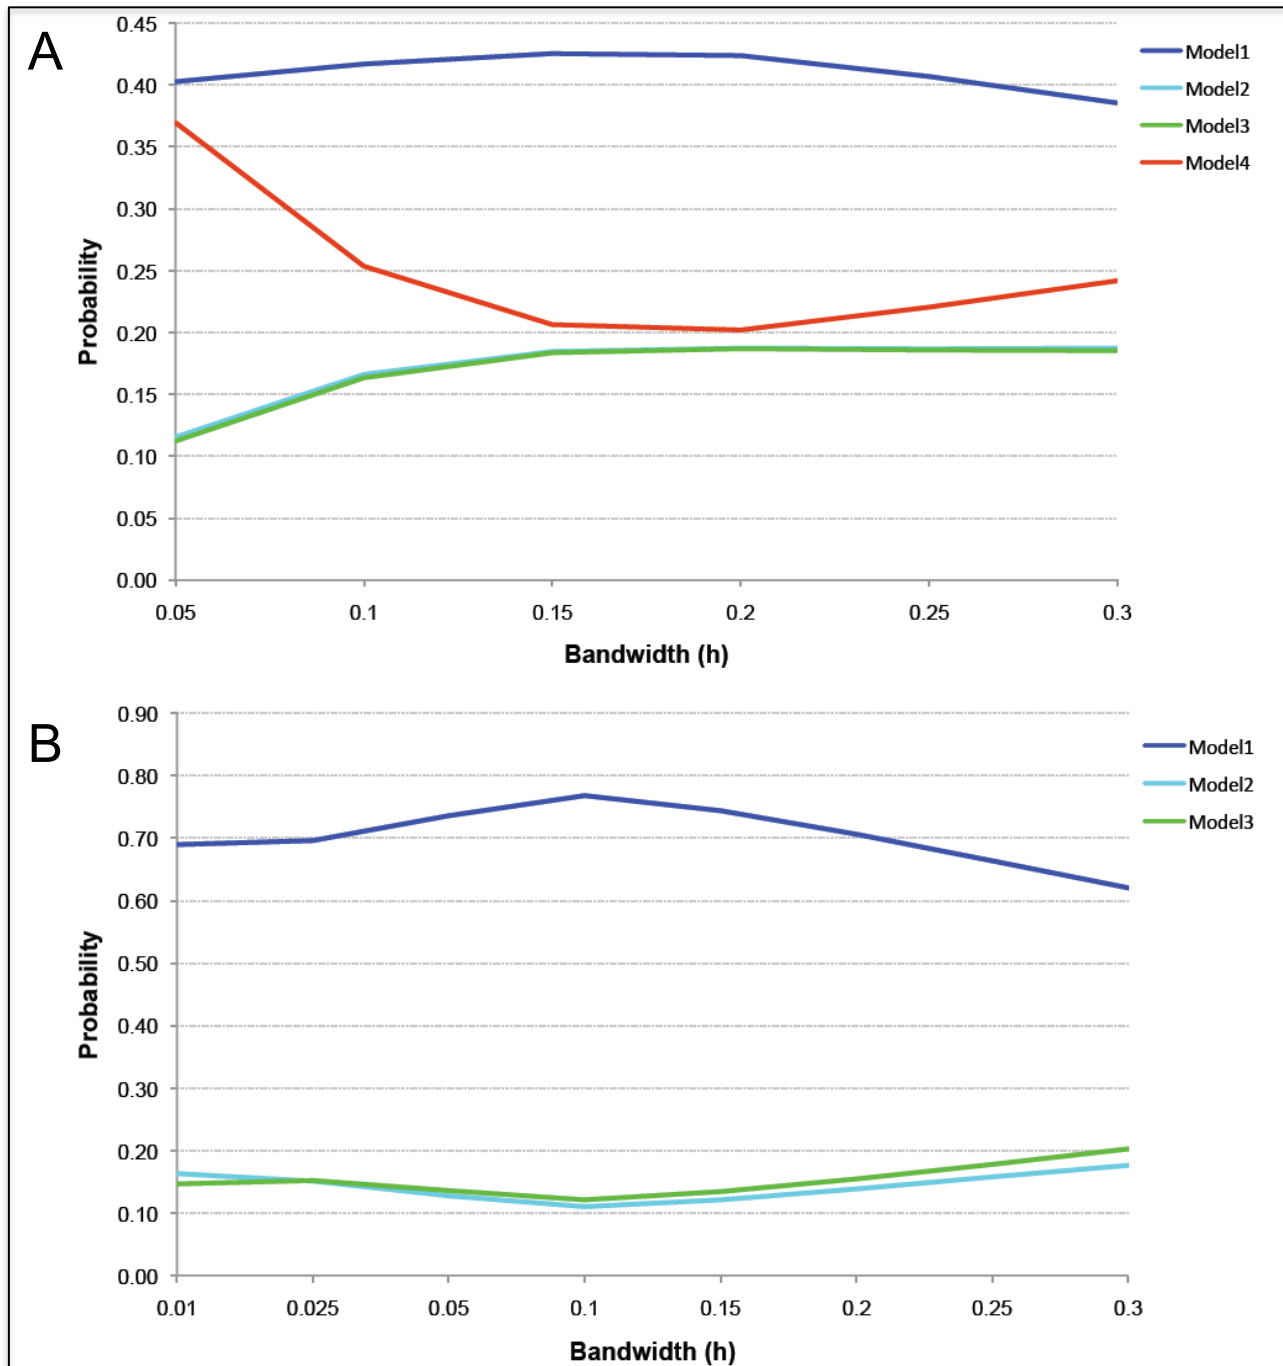

# SUPP FIG 11

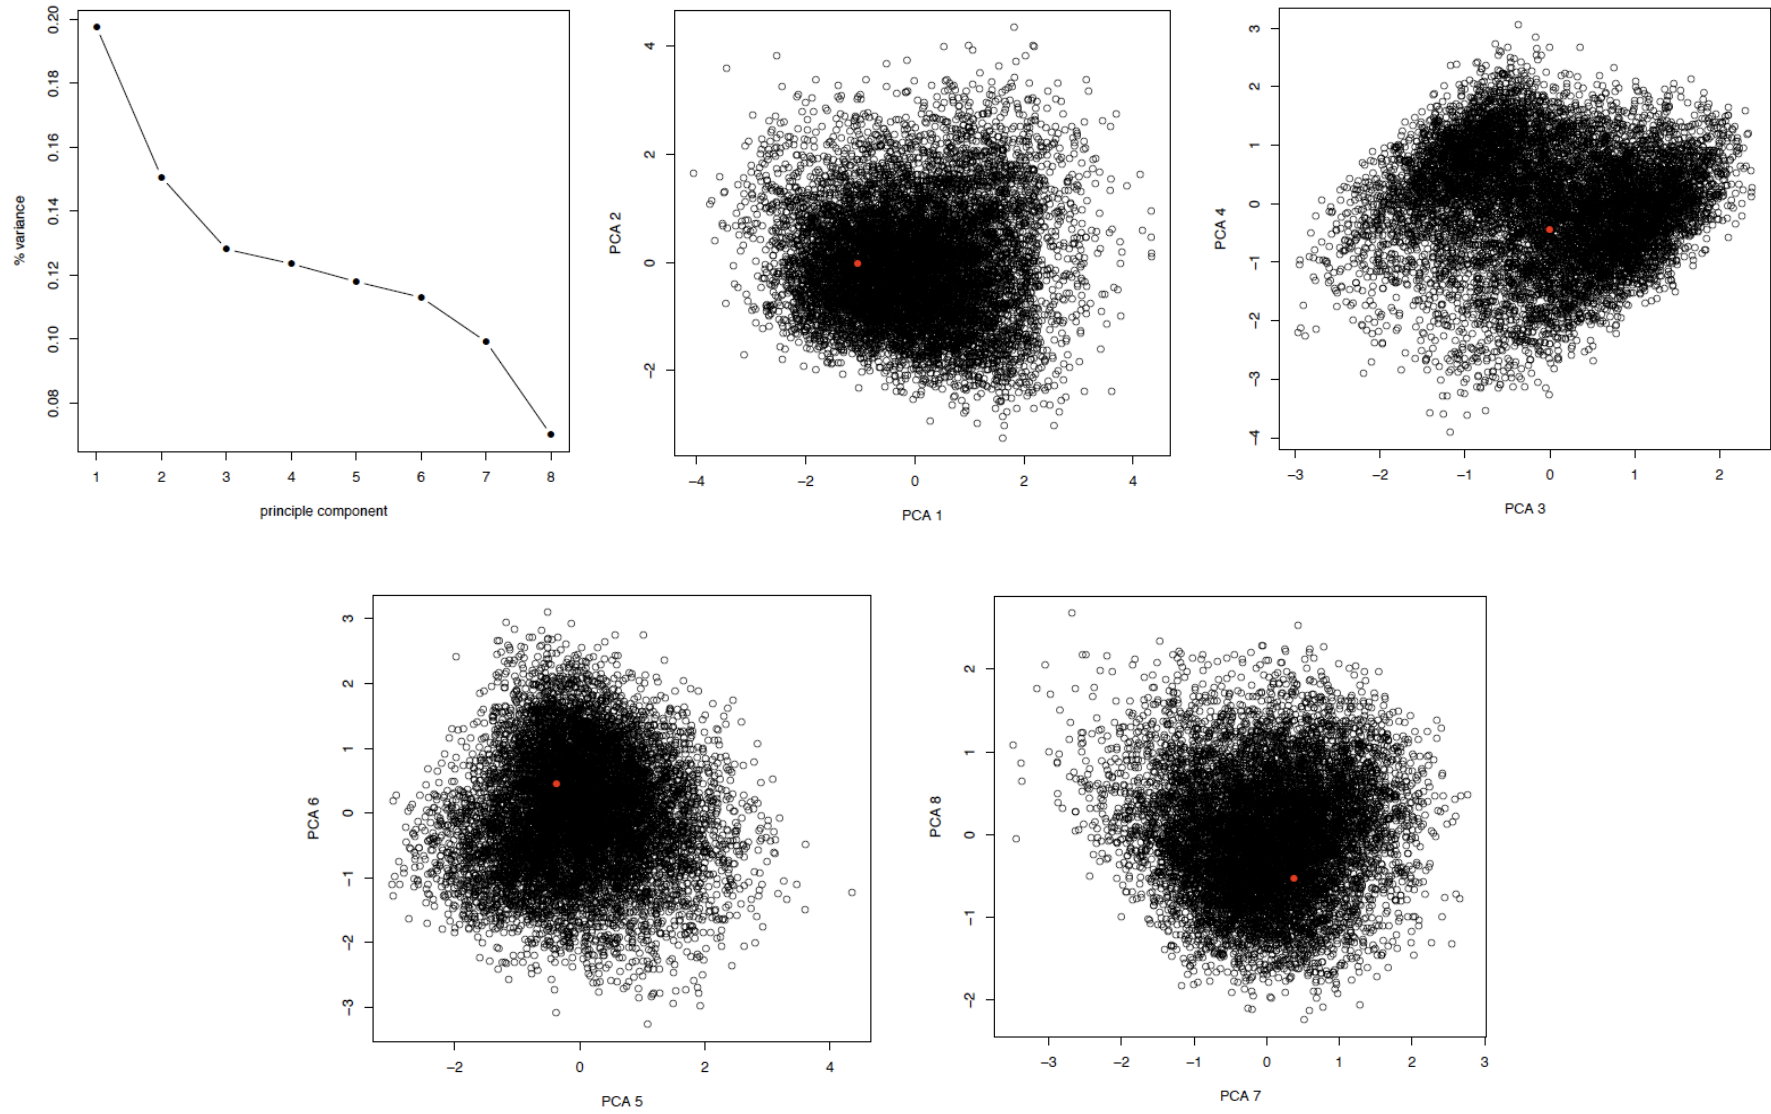

# SUPP FIG 12

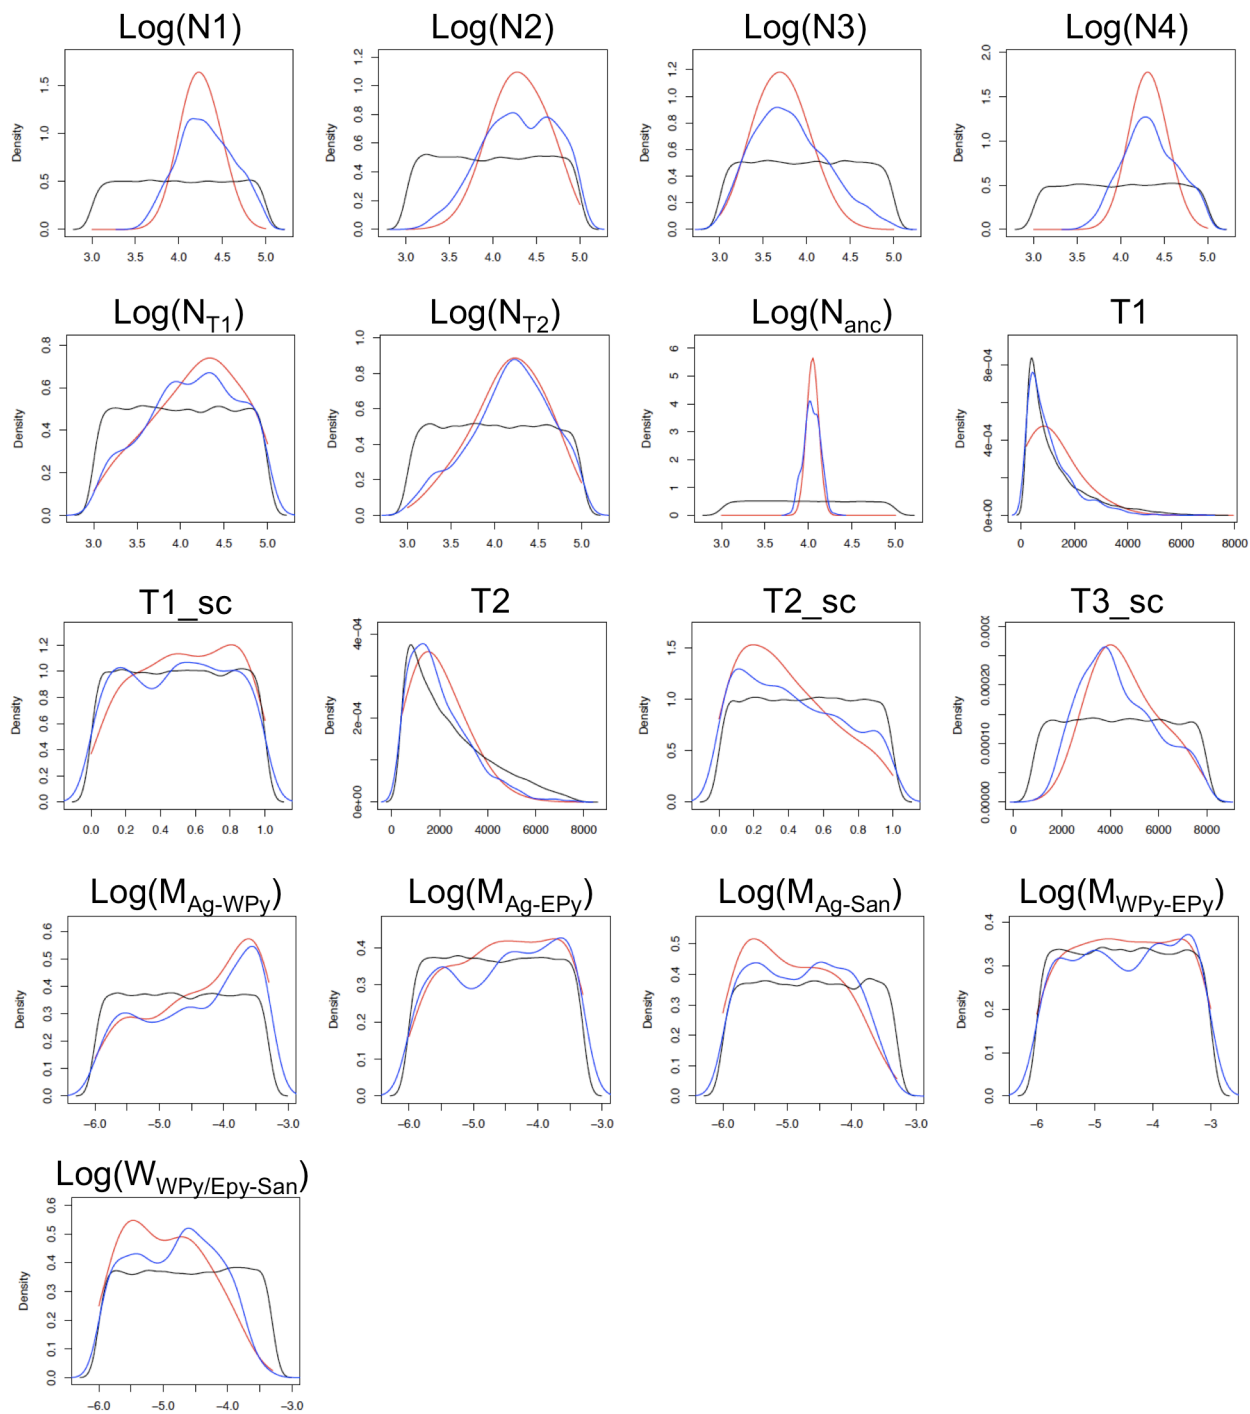

SUPP FIG 13

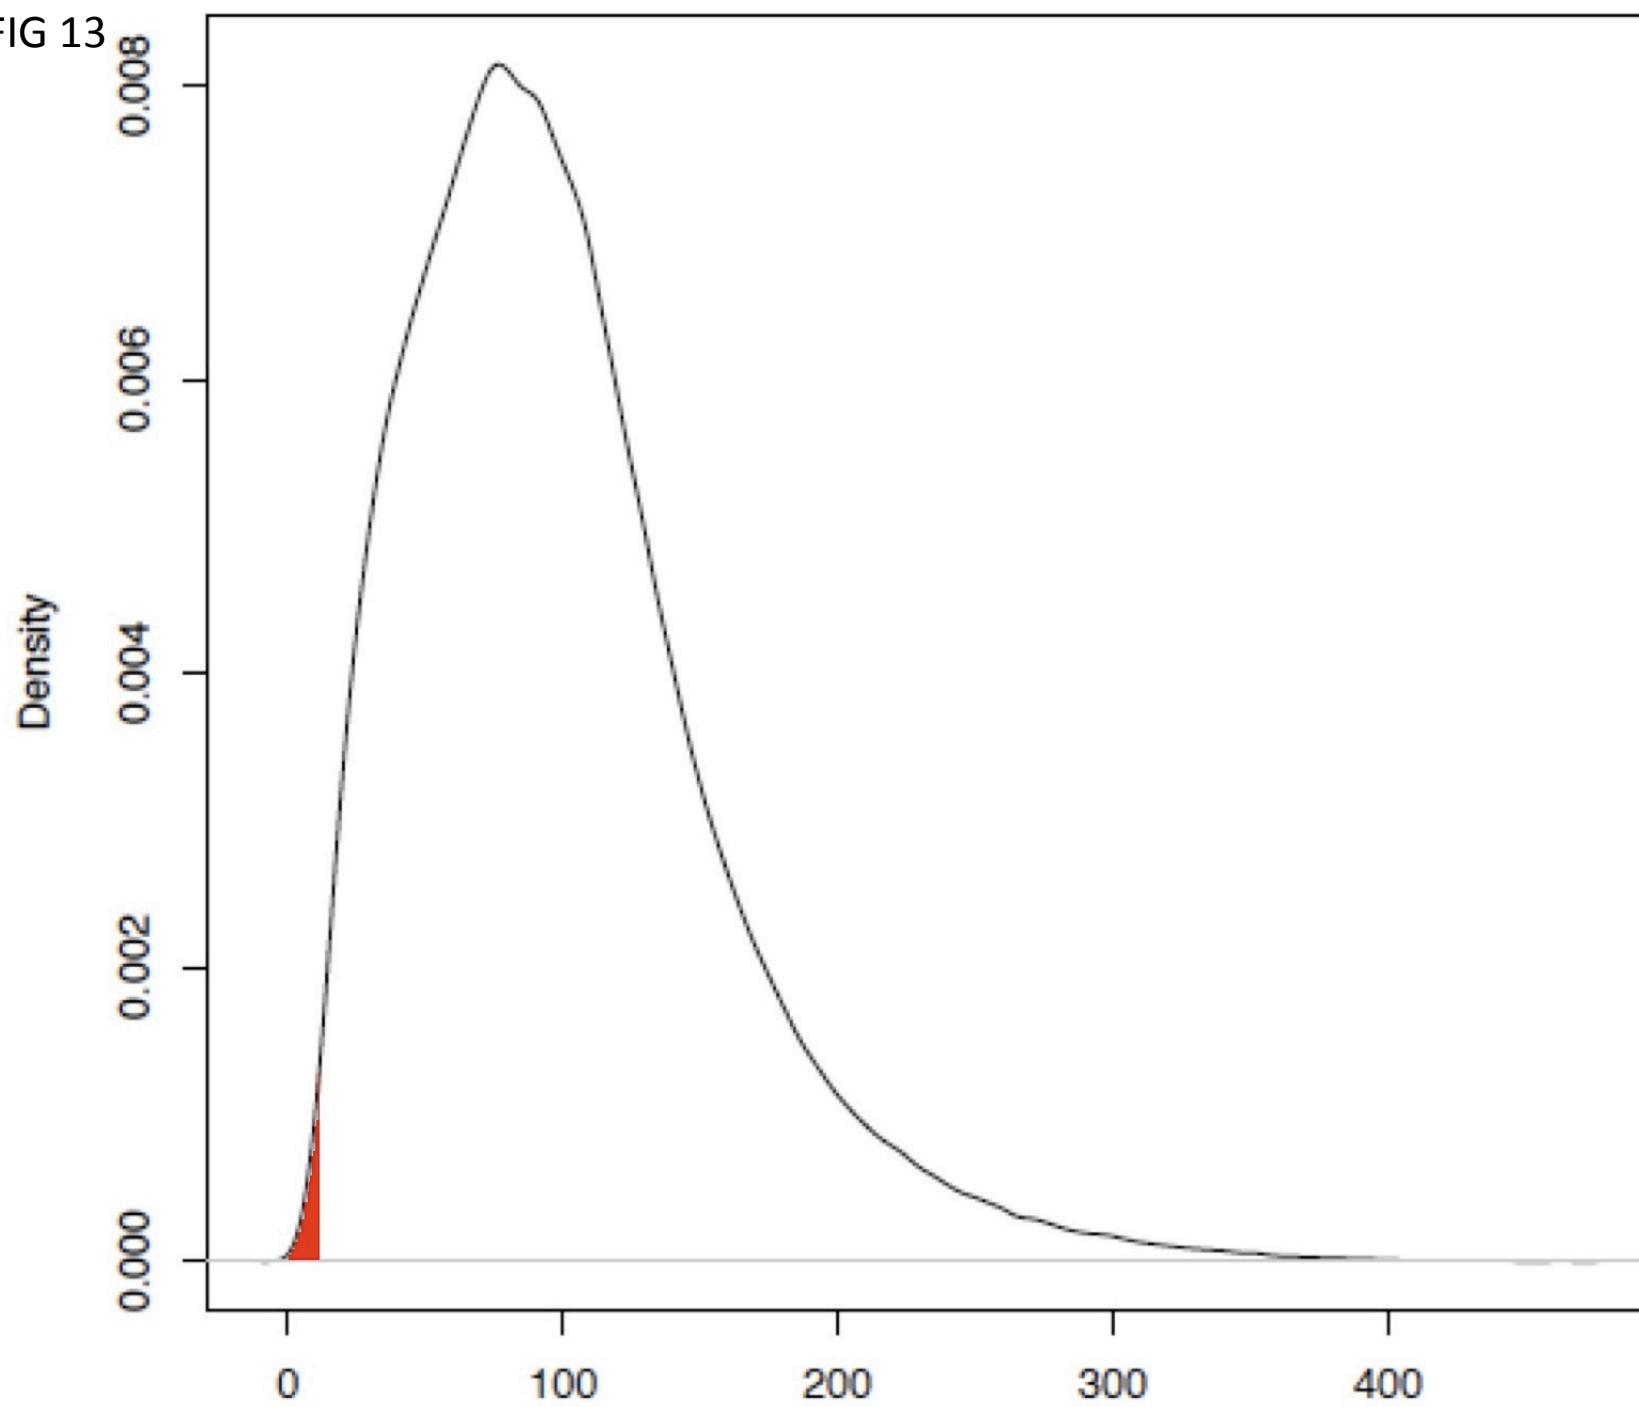

Supplement: supp_msr212_Veeramah_supp_figs_rev.pdf [file supp_msr212_Veeramah_supp_figs_rev.pdf]
